# Supplementary material
Source: publisher figshare collection journal article supplement (https://karger.figshare.com/articles/dataset/_/3458918)
Supplement: Supplementary file 1 [file 1]

## Supplementary Materials

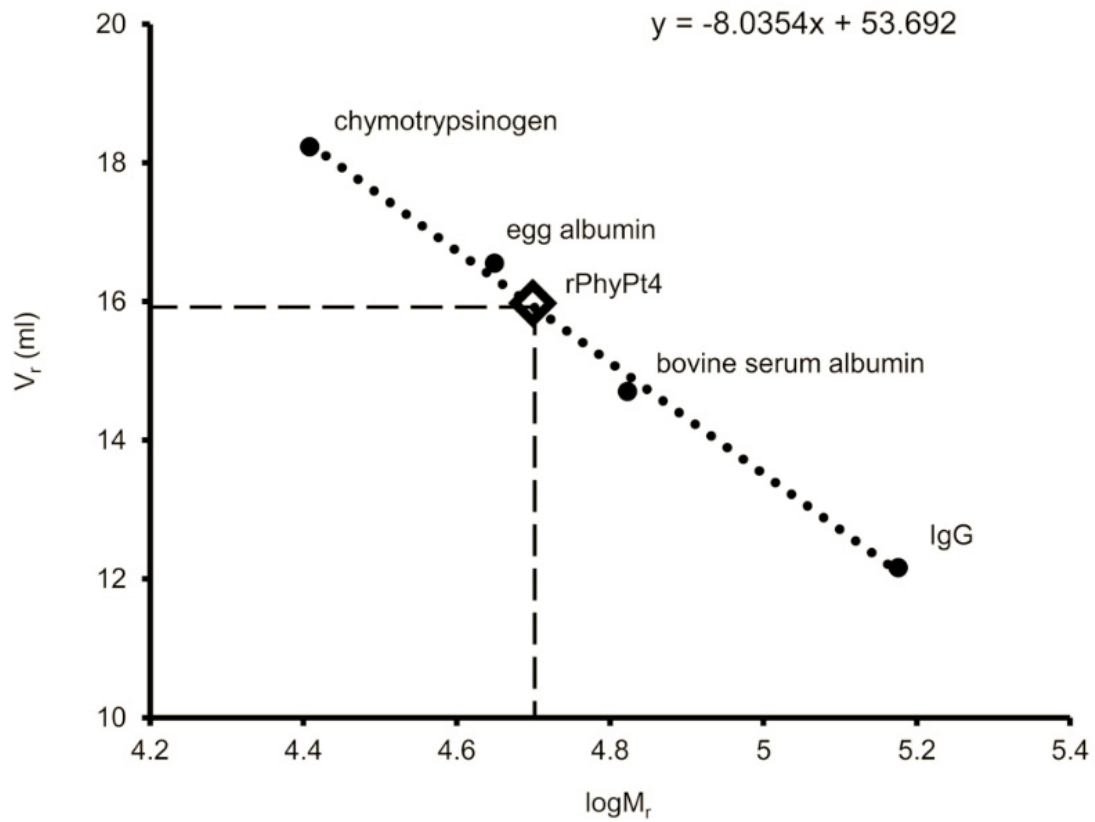

**Fig. S1.** Determination of rPhyPt4 molecular mass ( $M_r$ ) by the retention-volume ( $V_r$ ) in gel-filtration. The retention-volumes of the four calibrating proteins shown by solid dots were 18.23 ml, 16.55 ml, 14.70 ml and 12.16 ml, respectively. The retention-volume of rPhyPt4 shown by an empty diamond was 15.92 ml, corresponding to a calculated molecular mass of 50.2 kDa.

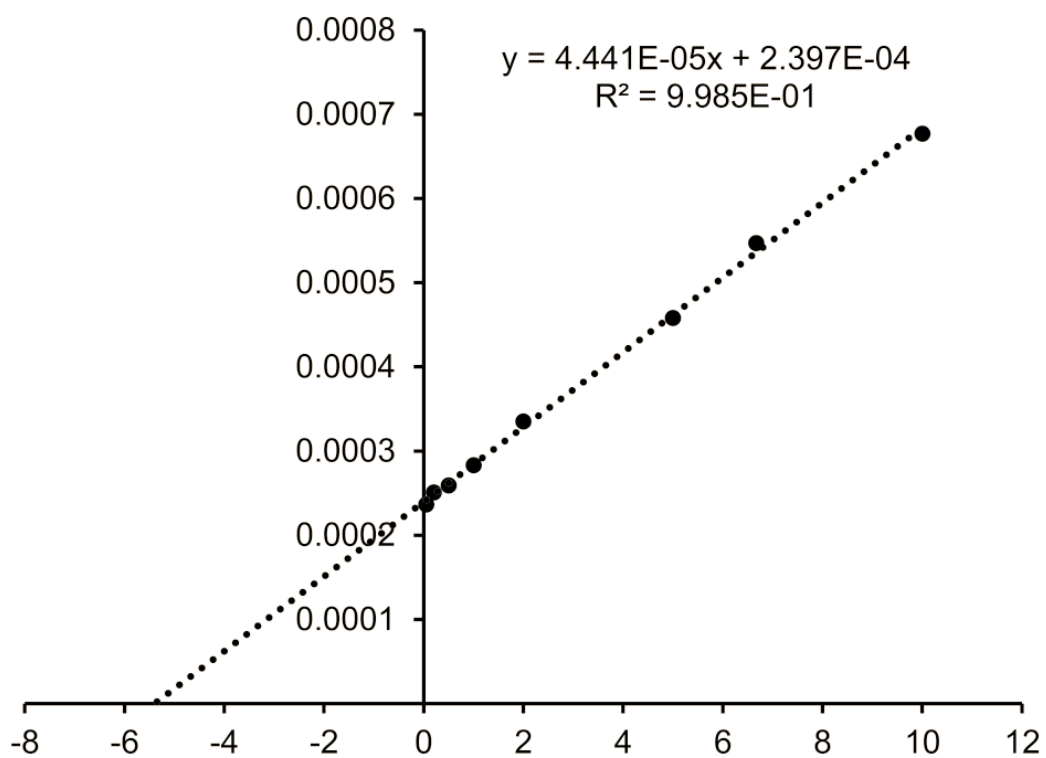

**Fig. S2.** The Lineweaver-Burk plot for calculating the  $K_m$  and  $V_{max}$  of rPhyPt4. [S] represents substrate concentration and V represents reaction velocity (measured by activity level) at the corresponding concentration.
