# Supplementary material
Source: publisher figshare collection journal article supplement (https://karger.figshare.com/articles/dataset/_/3458918)
Supplement: Supplementary file 2 [file 1]

Archive with 4 entries (4 files):
- FigS1.tif
- FigS2.tif
- MMB_201511005_2_9_Online_Supplementary_Figures.pdf
- Supplement.docx
