# Supplementary material
Source: publisher figshare collection journal article supplement (https://karger.figshare.com/articles/dataset/_/3458918)

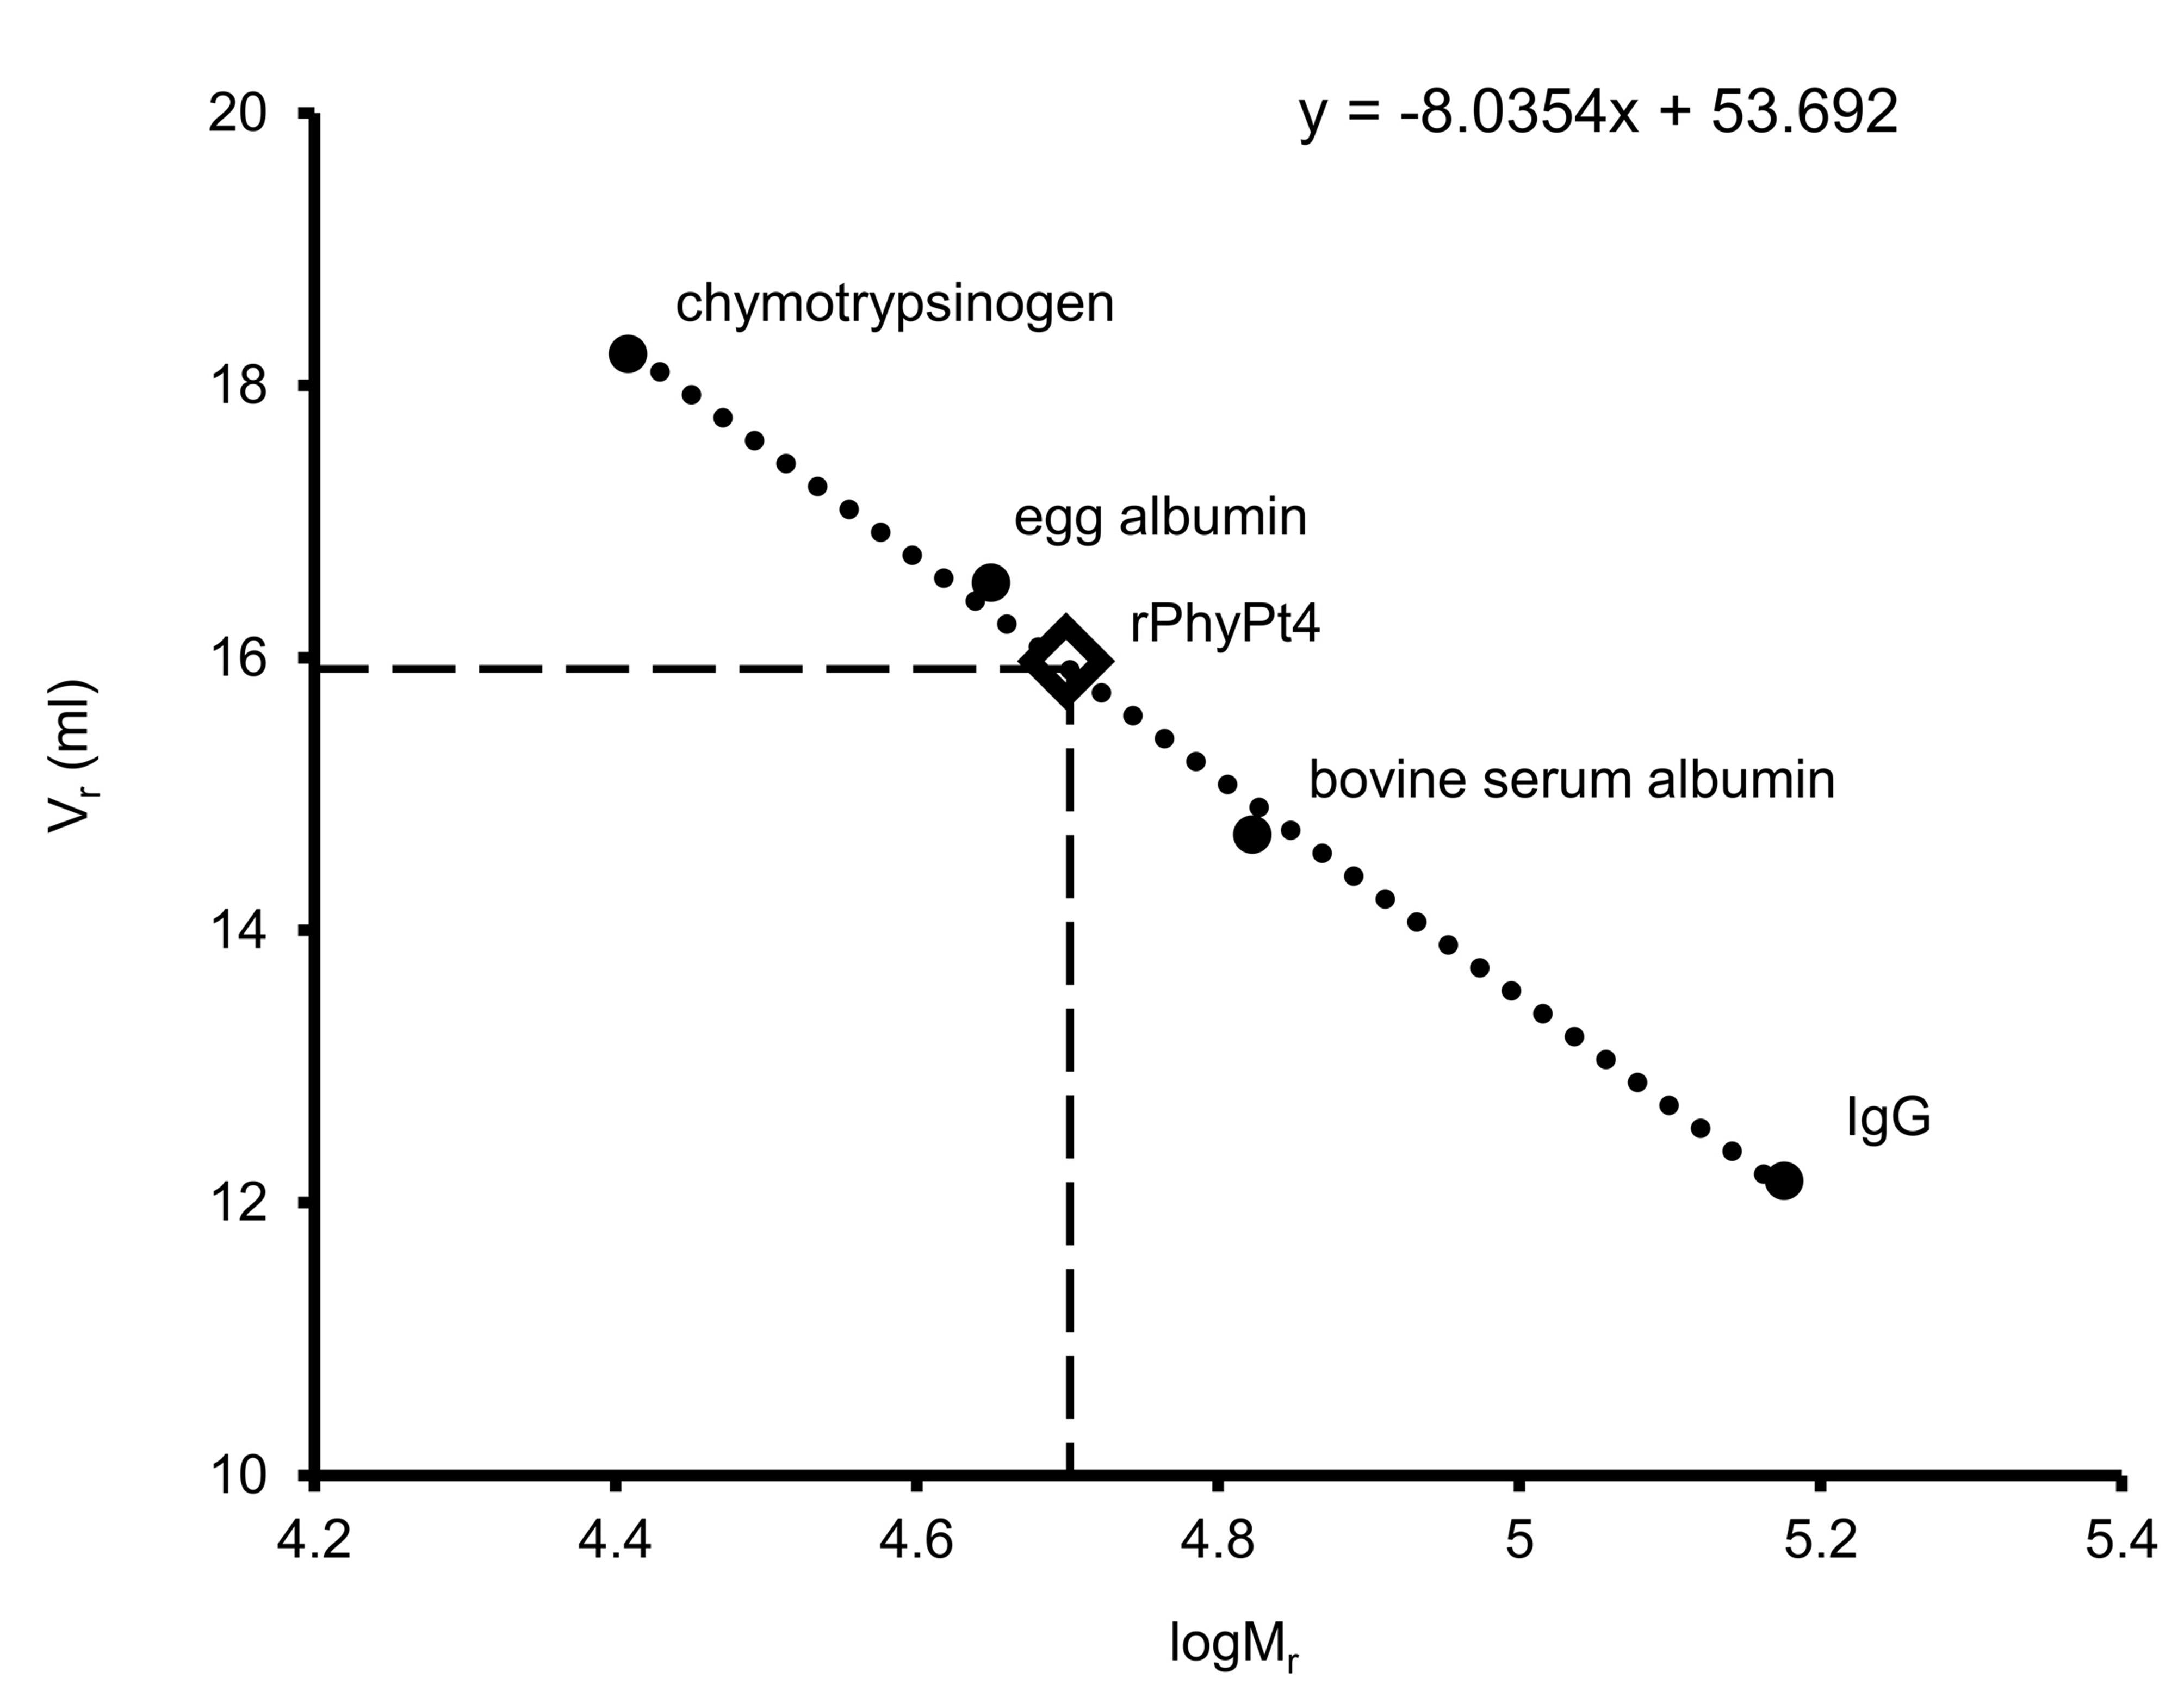

Supplement: Supplementary file 2 [file 1 › FigS1.tif]

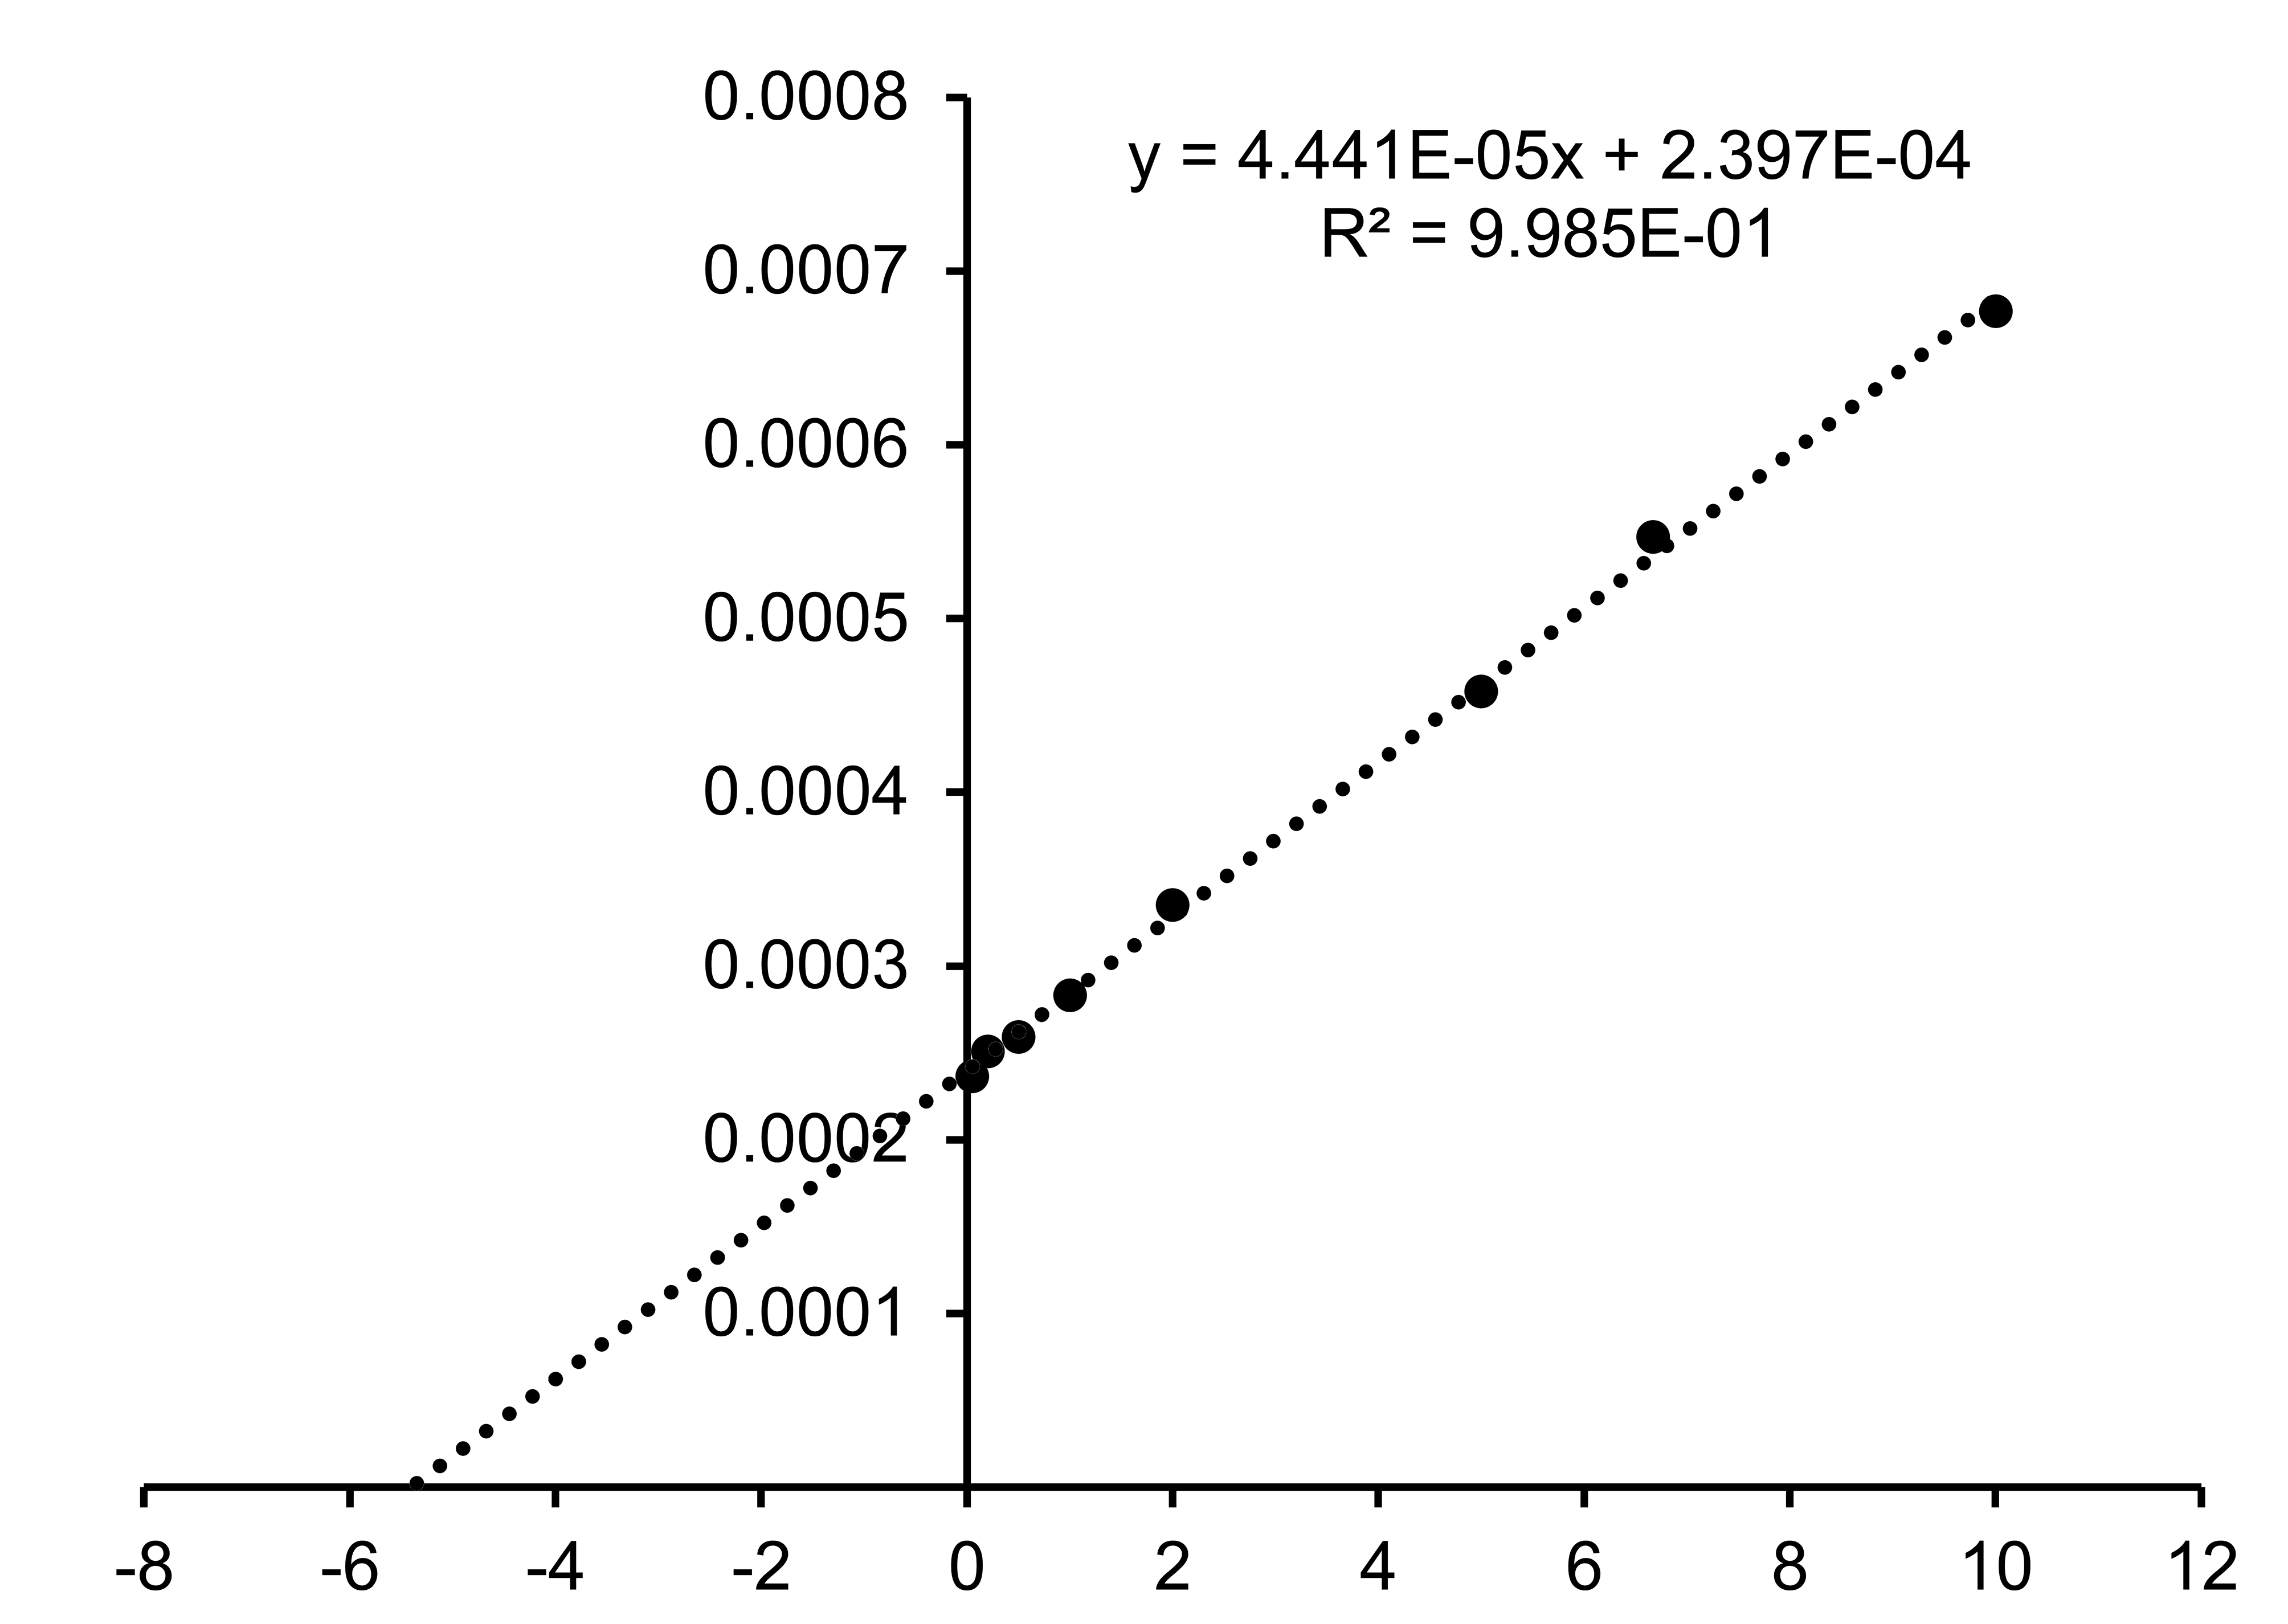

Supplement: Supplementary file 2 [file 1 › FigS2.tif]
